# Supplementary material for: Rethinking mental health care provided to migrants and refugees; a randomized controlled trial on the effectiveness of Value Based Counseling, a culturally sensitive, strength-based psychological intervention
Source: PubMed Central journal article supplement (PMC10065247; doi:10.1371/journal.pone.0283889), 2023-03-31
Supplement: pone.0283889.s001.pdf [file pone.0283889.s001.pdf]

S1 Table.

**Baseline sociodemographic characteristics of clients divided by groups (n=103)**

| <b>Baseline Demographics</b>         | <b>VBC group (n=53)<br/>n (%)</b> | <b>WL group (n=50)<br/>n (%)</b> | <b>p Value</b> |
|--------------------------------------|-----------------------------------|----------------------------------|----------------|
| <b>Gender</b>                        |                                   |                                  |                |
| Female                               | 22 (21.4)                         | 18 (17.5)                        | .56            |
| Male                                 | 31 (30.1)                         | 32 (31.1)                        |                |
| <b>Marital Status</b>                |                                   |                                  |                |
| Single                               | 23 (22.3)                         | 24 (23.3)                        | .72            |
| Married/Partnership                  | 22 (21.4)                         | 21 (20.4)                        |                |
| Divorced/Widowed                     | 8 (7.8)                           | 5 (4.9)                          |                |
| <b>Nationality</b>                   |                                   |                                  |                |
| Afghanistan                          | 10 (9.7)                          | 12 (11.7)                        | .83            |
| Iran                                 | 23 (22.3)                         | 17 (16.5)                        |                |
| Syria                                | 11 (10.7)                         | 11 (10.7)                        |                |
| Other Arab countries                 | 4 (3.9)                           | 6 (5.8)                          |                |
| African countries                    | 5 (4.9)                           | 4 (3.9)                          |                |
| <b>Religion</b>                      |                                   |                                  |                |
| Muslim                               | 29 (28.7)                         | 31 (30.7)                        | .44            |
| Christiane                           | 7 (6.9)                           | 3 (3)                            |                |
| No religion                          | 16 (15.8)                         | 15 (14.9)                        |                |
| <b>Residence Status</b>              |                                   |                                  |                |
| Asylum seeker                        | 37 (35.9)                         | 30 (29.1)                        | .57            |
| Acquiesce                            | 11 (10.7)                         | 14 (13.6)                        |                |
| Other                                | 5 (4.9)                           | 6 (5.8)                          |                |
| <b>Accommodation</b>                 |                                   |                                  |                |
| Refugee dormitory                    | 27 (26.2)                         | 21 (20.4)                        | .63            |
| Private apartments                   | 18 (17.5)                         | 21 (20.4)                        |                |
| Others                               | 8 (7.8)                           | 8 (7.8)                          |                |
| <b>Education</b>                     |                                   |                                  |                |
| Elementary to middle school          | 20 (19.4)                         | 14 (13.6)                        | .31            |
| Diploma                              | 29 (28.2)                         | 28 (27.2)                        |                |
| No education                         | 4 (3.9)                           | 8 (7.8)                          |                |
| <b>Professional Qualification</b>    |                                   |                                  |                |
| University degree                    | 21 (20.6)                         | 16 (15.7)                        | .25            |
| Vocational training                  | 7 (6.9)                           | 13 (12.7)                        |                |
| Other                                | 11 (10.8)                         | 6 (5.9)                          |                |
| None                                 | 13 (12.7)                         | 15 (14.7)                        |                |
| <b>Work</b>                          |                                   |                                  |                |
| No                                   | 37 (35.9)                         | 34 (33)                          | .84            |
| Yes                                  | 16 (15.5)                         | 16 (15.5)                        |                |
| <b>Income</b>                        |                                   |                                  |                |
| Less than 500 €                      | 29 (29.6)                         | 28 (28.6)                        | .95            |
| 500-1000 €                           | 12 (12.2)                         | 10 (10.2)                        |                |
| 1000-1500 €                          | 10 (10.2)                         | 9 (9.2)                          |                |
| <b>Family Members in Germany</b>     |                                   |                                  |                |
| None                                 | 20 (19.4)                         | 20 (19.4)                        | .84            |
| One or two                           | 10 (9.7)                          | 11 (10.7)                        |                |
| Three or more                        | 23 (22.3)                         | 19 (18.4)                        |                |
| <b>Age: M (SD)</b>                   | 30.42 (7.79)                      | 30.75 (8.43)                     | .80            |
| <b>Time spent in Germany: M (SD)</b> | 33.44 (16.90)                     | 35.20 (23.81)                    | .66            |

VBC: Value-Based Counseling; WL: Waiting List
