# Supplementary material for: Rethinking mental health care provided to migrants and refugees; a randomized controlled trial on the effectiveness of Value Based Counseling, a culturally sensitive, strength-based psychological intervention
Source: PubMed Central journal article supplement (PMC10065247; doi:10.1371/journal.pone.0283889), 2023-03-31
Supplement: pone.0283889.s002.pdf [file pone.0283889.s002.pdf]

**S2 Table.**

**Baseline sociodemographic characteristics across low and moderate-to-high resilience groups (n=103)**

| Baseline Demographics<br>n (%)                 | Whole<br>Sample<br>(n= 103) | Low resilience<br>(n=86) | Moderate to high<br>resilience (n=17) | <i>P</i><br><i>value</i> |
|------------------------------------------------|-----------------------------|--------------------------|---------------------------------------|--------------------------|
| Gender                                         |                             |                          |                                       |                          |
| <b>Female</b>                                  | 40 (38.8)                   | 33 (38.4)                | 7 (41.2)                              | .82                      |
| <b>Male</b>                                    | 63 (61.2)                   | 53 (61.6)                | 10 (58.8)                             |                          |
| Marital Status                                 |                             |                          |                                       |                          |
| <b>Single</b>                                  | 47 (45.6)                   | 44 (51.2)                | 3 (17.6)                              | .01*                     |
| <b>Married/Partnership</b>                     | 43 (41.7)                   | 34 (39.5)                | 9 (52.9)                              |                          |
| <b>Divorced/Widowed</b>                        | 13 (12.6)                   | 8 (9.3)                  | 5 (29.4)                              |                          |
| Nationality                                    |                             |                          |                                       |                          |
| <b>Afghanistan</b>                             | 22 (21.4)                   | 18 (20.9)                | 4 (23.5)                              | .00**                    |
| <b>Iran</b>                                    | 40 (38.8)                   | 35 (40.7)                | 5 (29.4)                              |                          |
| <b>Arab countries (e.g. Syria)<sup>1</sup></b> | 32 (31.1)                   | 30 (34.9)                | 2 (11.8)                              |                          |
| <b>African countries<sup>2</sup></b>           | 9 (8.7)                     | 3 (3.5)                  | 6 (35.3)                              |                          |
| Religion                                       |                             |                          |                                       |                          |
| <b>Muslim</b>                                  | 60 (59.4)                   | 46 (54.8)                | 14 (82.4)                             | .10                      |
| <b>Christiane</b>                              | 10 (9.9)                    | 9 (10.7)                 | 1 (5.9)                               |                          |
| <b>No religion</b>                             | 31 (30.7)                   | 29 (34.5)                | 2 (11.8)                              |                          |
| Residence Status                               |                             |                          |                                       |                          |
| <b>Asylum seeker/refugee</b>                   | 67 (65)                     | 54 (62.8)                | 13 (76.5)                             | .08                      |
| <b>Acquiesce</b>                               | 25 (24.3)                   | 24 (27.9)                | 1 (5.9)                               |                          |
| <b>Other<sup>3</sup></b>                       | 11 (10.7)                   | 8 (9.3)                  | 3 (17.6)                              |                          |
| Accommodation                                  |                             |                          |                                       |                          |
| <b>Refugee dormitory</b>                       | 48 (46.6)                   | 37 (43)                  | 11 (64.7)                             | .21                      |
| <b>Private apartments</b>                      | 39 (37.9)                   | 34 (39.5)                | 5 (29.4)                              |                          |
| <b>Others (e.g. student dormitory)</b>         | 16 (15.5)                   | 15 (17.4)                | 1 (5.9)                               |                          |
| Education                                      |                             |                          |                                       |                          |
| <b>Elementary to middle school</b>             | 34 (33)                     | 26 (30.2)                | 8 (47.1)                              | .37                      |
| <b>Diploma</b>                                 | 57 (55.3)                   | 50 (58.1)                | 7 (41.2)                              |                          |
| <b>No education</b>                            | 12 (11.7)                   | 10 (11.6)                | 2 (11.8)                              |                          |
| Professional Qualification                     |                             |                          |                                       |                          |

|                                         |               |               |                |     |
|-----------------------------------------|---------------|---------------|----------------|-----|
| <b>University degree</b>                | 37 (35.9)     | 31 (36.5)     | 6 (35.3)       |     |
| <b>Other (e.g. vocational training)</b> | 37 (35.9)     | 31 (36.5)     | 6 (35.3)       | .98 |
| <b>None</b>                             | 28 (27.2)     | 23 (27.1)     | 5 (29.4)       |     |
| Work                                    |               |               |                |     |
| <b>No</b>                               | 71 (68.9)     | 59 (68.6)     | 12 (70.6)      | .87 |
| <b>Yes</b>                              | 32 (31.1)     | 27 (31.4)     | 5 (29.4)       |     |
| Income                                  |               |               |                |     |
| <b>Less than 500 €</b>                  | 57 (56.4)     | 49 (58.3)     | 8 (47.1)       | .39 |
| <b>More than 500 €</b>                  | 44 (43.6)     | 35 (41.7)     | 9 (52.9)       |     |
| Family Members in Germany               |               |               |                |     |
| <b>None</b>                             | 40 (38.8)     | 31 (36)       | 9 (52.9)       | .41 |
| <b>One or two</b>                       | 21 (20.4)     | 18 (20.9)     | 3 (17.6)       |     |
| <b>Three or more</b>                    | 42 (40.8)     | 37 (43)       | 5 (29.4)       |     |
| Age: M (SD)                             | 30.76 (8.63)  | 30.77 (8.36)  | 30.70 (10.15)  | .97 |
| Range                                   | 18-62         |               |                |     |
| Time spent in Germany: M (SD)           | 45.17 (64.08) | 41.23 (47.60) | 66.12 (118.85) | .42 |
| Range (months)                          | 1-480         |               |                |     |

\*. *Significant difference at the 0.05 level.*

\*\**. Significant difference at the 0.01 level.*

<sup>1</sup>. *Arab countries include participants mostly from Syria (n= 22), and then Iraq (n= 5), Lebanon (n= 2), Egypt (n= 1), Palestine (n= 1), and Yemen (n= 1).*

<sup>2</sup>. *African countries include participants from Guinea (n= 8), and Burkina Faso (n= 1).*

<sup>3</sup>. *This category includes naturalized Germans (n= 4), EU citizens (n= 3), and participants without a residence permit (n= 4).*
