# Supplementary material for: Rethinking mental health care provided to migrants and refugees; a randomized controlled trial on the effectiveness of Value Based Counseling, a culturally sensitive, strength-based psychological intervention
Source: PubMed Central journal article supplement (PMC10065247; doi:10.1371/journal.pone.0283889), 2023-03-31
Supplement: pone.0283889.s004.pdf [file pone.0283889.s004.pdf]

S2 File

Pearson Chi-square post hoc test outputs for the large contingency tables

**2 x 3 contingency table of marital status and two subcategories of resilience**

**Case Processing Summary**

|                                                                 | Valid |         | Cases Missing |         | Total |         |
|-----------------------------------------------------------------|-------|---------|---------------|---------|-------|---------|
|                                                                 | N     | Percent | N             | Percent | N     | Percent |
| Recoding marital status into 3 categories *<br>ResilieeCATEGORY | 103   | 100.0%  | 0             | 0.0%    | 103   | 100.0%  |

**Recoding marital status into 3 categories \* ResilieeCATEGORY Crosstabulation**

|                                           |                           | ResilieeCATEGORY          |                             | Total  |       |
|-------------------------------------------|---------------------------|---------------------------|-----------------------------|--------|-------|
|                                           |                           | Low resilience            | Moderate to high resilience |        |       |
| Recoding marital status into 3 categories | single                    | Count                     | 44                          | 3      | 47    |
|                                           |                           | Expected Count            | 39.2                        | 7.8    | 47.0  |
|                                           |                           | % within ResilieeCATEGORY | 51.2%                       | 17.6%  | 45.6% |
|                                           |                           | Standardized Residual     | .76                         | -1.71  |       |
|                                           | married-in a relationship | Count                     | 34                          | 9      | 43    |
|                                           |                           | Expected Count            | 35.9                        | 7.1    | 43.0  |
|                                           |                           | % within ResilieeCATEGORY | 39.5%                       | 52.9%  | 41.7% |
|                                           |                           | Standardized Residual     | -.32                        | .71    |       |
|                                           | divorced-widowed          | Count                     | 8                           | 5      | 13    |
|                                           |                           | Expected Count            | 10.9                        | 2.1    | 13.0  |
|                                           |                           | % within ResilieeCATEGORY | 9.3%                        | 29.4%  | 12.6% |
|                                           |                           | Standardized Residual     | -.87                        | 1.95   |       |
| Total                                     | Count                     | 86                        | 17                          | 103    |       |
|                                           | Expected Count            | 86.0                      | 17.0                        | 103.0  |       |
|                                           | % within ResilieeCATEGORY | 100.0%                    | 100.0%                      | 100.0% |       |

**Chi-Square Tests**

|                              | Value              | df | Asymptotic<br>Significance (2-<br>sided) |
|------------------------------|--------------------|----|------------------------------------------|
| Pearson Chi-Square           | 8.653 <sup>a</sup> | 2  | .013                                     |
| Likelihood Ratio             | 8.520              | 2  | .014                                     |
| Linear-by-Linear Association | 8.536              | 1  | .003                                     |
| N of Valid Cases             | 103                |    |                                          |

a. 1 cells (16.7%) have expected count less than 5. The minimum expected count is 2.15.

| adjusted standardized residuals for marital status | adjusted p value |
|----------------------------------------------------|------------------|
| 2.54                                               | .011241          |
| -2.54                                              | .011241          |
| -1.02                                              | .305734          |
| 1.02                                               | .305734          |
| -2.28                                              | .022525          |
| 2.28                                               | .022525          |

## 2 x 4 contingency table of nationality and two subcategories of resilience

### Case Processing Summary

|                                      | Cases |         |         |         |       |         |
|--------------------------------------|-------|---------|---------|---------|-------|---------|
|                                      | Valid |         | Missing |         | Total |         |
|                                      | N     | Percent | N       | Percent | N     | Percent |
| Recodeorigine *<br>ResilieceCATEGORY | 103   | 100.0%  | 0       | 0.0%    | 103   | 100.0%  |

### Re\_recodeorigine \* ResilieceCATEGORY Crosstabulation

|                  |        | ResilieceCATEGORY          |       | Total |       |
|------------------|--------|----------------------------|-------|-------|-------|
|                  |        | 1.00                       | 2.00  |       |       |
| Re_recodeorigine | Afghan | Count                      | 18    | 4     | 22    |
|                  |        | Expected Count             | 18.4  | 3.6   | 22.0  |
|                  |        | % within ResilieceCATEGORY | 20.9% | 23.5% | 21.4% |
|                  |        | Adjusted Residual          | -.24  | .24   |       |
|                  | Iran   | Count                      | 35    | 5     | 40    |

|                             |                             |        |        |        |
|-----------------------------|-----------------------------|--------|--------|--------|
|                             | Expected Count              | 33.4   | 6.6    | 40.0   |
|                             | % within ResilieeceCATEGORY | 40.7%  | 29.4%  | 38.8%  |
|                             | Adjusted Residual           | .87    | -.87   |        |
| <b>Arab</b>                 | Count                       | 30     | 2      | 32     |
| <b>countri<br/>es</b>       | Expected Count              | 26.7   | 5.3    | 32.0   |
|                             | % within ResilieeceCATEGORY | 34.9%  | 11.8%  | 31.1%  |
|                             | Adjusted Residual           | 1.88   | -1.88  |        |
| <b>Africa</b>               | Count                       | 3      | 6      | 9      |
| <b>n<br/>countri<br/>es</b> | Expected Count              | 7.5    | 1.5    | 9.0    |
|                             | % within ResilieeceCATEGORY | 3.5%   | 35.3%  | 8.7%   |
|                             | Adjusted Residual           | -4.24  | 4.24   |        |
| <b>Total</b>                | Count                       | 86     | 17     | 103    |
|                             | Expected Count              | 86.0   | 17.0   | 103.0  |
|                             | % within ResilieeceCATEGORY | 100.0% | 100.0% | 100.0% |
|                             |                             |        |        |        |

### Chi-Square Tests

|                              | Value               | df | Asymptotic<br>Significance (2-<br>sided) | Exact Sig. (2-<br>sided) | Exact Sig. (1-<br>sided) | Point Probability |
|------------------------------|---------------------|----|------------------------------------------|--------------------------|--------------------------|-------------------|
| Pearson Chi-Square           | 19.385 <sup>a</sup> | 3  | .000                                     | .000                     |                          |                   |
| Likelihood Ratio             | 14.854              | 3  | .002                                     | .003                     |                          |                   |
| Fisher's Exact Test          | 14.536              |    |                                          | .001                     |                          |                   |
| Linear-by-Linear Association | 2.523 <sup>b</sup>  | 1  | .112                                     | .139                     | .075                     | .034              |
| N of Valid Cases             | 103                 |    |                                          |                          |                          |                   |

a. 2 cells (25.0%) have expected count less than 5. The minimum expected count is 1.49.

b. The standardized statistic is 1.588.

| adjusted standardized residuals for nationality | adjusted p value |
|-------------------------------------------------|------------------|
| -.24                                            | .811158          |
| .24                                             | .811158          |
| .87                                             | .382976          |
| -.87                                            | .382976          |
| 1.88                                            | .059814          |
| -1.88                                           | .059814          |
| -4.24                                           | .000022          |
| 4.24                                            | .000022          |
